# Supplementary material
Source: ML conference proceedings conference paper supplement (https://proceedings.neurips.cc/paper_files/paper/2023/hash/0a6059857ae5c82ea9726ee9282a7145-Abstract.html)
Supplement: Supplementary file 1 [file 0a6059857ae5c82ea9726ee9282a7145-Supplemental-Conference.pdf]

## 475 Appendix

### 476 A Extended Related Work and Discussion

477 **Parameter-Efficient Fine-tuning.** Parameter-efficient tuning methods select a small subset of  
 478 parameters or insert a few parameters to a pre-trained network. Then they only update the small  
 479 subset of parameters, while keeping others fixed [7, 8, 9, 10, 11, 12, 13, 41]. For example, Adapters  
 480 [13, 12] insert a small module into the transformer blocks and only update it. Similarly, prompt  
 481 tuning [7] introduces a small vector that is concatenated with the input embeddings. BitFit [10] only  
 482 tunes the bias term of the model. LoRA [11] injects trainable rank decomposition matrices into the  
 483 transformer block. Although these methods are “parameter-efficient”, they actually cannot reduce the  
 484 memory usage of the model itself. This is because we still need to build the computation graph for  
 485 the whole model. Instead, the memory usage of optimizer states will be significantly reduced, which  
 486 is in proportional to the number of trainable parameters [14].

487 **Gradient Checkpointing.** Gradient checkpointing helps decrease activation memory usage by  
 488 saving only a selection of activations. However, it demands additional computation during the  
 489 backward pass, as discarded activations must be recalculated [17, 16]. According to the report of  
 490 Checkmate<sup>2</sup> [16], it achieves “a 2.3x memory reduction when training a BERT model with Checkmate  
 491 optimizations (at 1x extra overhead for rematerialization)”.

492 **Limitations** Although WTA-CRS significantly reduces the computation of the backward pass in a  
 493 hardware-friendly way i.e., dropping entire rows/columns in the tensor, the current implementation  
 494 still hampers the execution time of linear operations. This is because the extra sampling process and  
 495 data movement counteract the acceleration. However, we note that (1) the overhead can be greatly  
 496 reduced with better implementation, e.g., using prefetch and operation-fusion technique [28]; (2) the  
 497 existing implementation can still yield a large speedup when employing larger batch sizes (Figure 9).

498 **Potential Negative Societal Impacts.** Our research primarily focuses on reducing the memory  
 499 requirement of fine-tuning Language Models (LMs). The carbon emissions produced by LM fine-  
 500 tuning may pose environmental issues. Our next step is to further improve the efficiency of LM  
 501 fine-tuning, particularly on hardware with lower energy consumption.

### 502 B Unbiasedness of Weight Gradient

503 This part we directly follow the proof of Theorem 1 in ActNN [15]. For completeness, we provide  
 504 the proof sketch here that is short and easy to follow. Specifically, here we use ReLU as the activation  
 505 function for illustration convenience. We note that the conclusion in this section holds for any  
 506 non-linear activation function. Specifically, the forward pass of ReLU-Linear at the  $l^{\text{th}}$  layer is

$$\begin{aligned}\mathbf{Z}^{(l+1)} &= \mathbf{H}^{(l)} \mathbf{W}^{(l)}, \\ \mathbf{H}^{(l+1)} &= \text{ReLU}(\mathbf{Z}^{(l+1)}),\end{aligned}$$

507 and the backward pass of ReLU is:

$$\begin{aligned}\mathbb{E}[\nabla \mathbf{Z}^{(l+1)}] &= \mathbb{E}[\mathbb{1}_{\mathbf{Z}^{(l+1)} > 0} \odot \nabla \mathbf{H}^{(l+1)}] \\ &= \mathbb{1}_{\mathbf{Z}^{(l+1)} > 0} \odot \mathbb{E}[\nabla \mathbf{H}^{(l+1)}],\end{aligned}$$

508 where  $\odot$  is the element-wise product and  $\mathbb{1}$  is the indicator function. The element-wise product  
 509 is linear operation and  $\mathbb{1}_{\mathbf{Z}^{(l+1)} > 0}$  is only related to the pre-activation  $\mathbf{Z}^{(l+1)}$  in the forward pass.  
 510 We only apply the approximation during the backward pass so  $\mathbb{1}_{\mathbf{Z}^{(l+1)} > 0}$  can be extracted from  
 511 the expectation. We know that for the last layer  $L$ , we have  $\mathbb{E}[\nabla \mathbf{H}^{(L)}] = \mathbf{H}^{(L)}$  since we do not  
 512 apply activation at the output layer. We then can prove by induction that  $\mathbb{E}[\nabla \mathbf{H}^{(l+1)}] = \mathbf{H}^{(l+1)}$  and  
 513  $\mathbb{E}[\nabla \mathbf{W}^{(l)}] = \mathbf{W}^{(l)}$  for any layer  $l$ .

<sup>2</sup><https://github.com/parasj/checkmate/issues/153>

## 514 C Proof

### 515 C.1 Derivation of Equation (3)

516 Let  $\mathbf{X} \in \mathbb{R}^{n \times m}$ ,  $\mathbf{Y} \in \mathbb{R}^{m \times q}$  be two matrices. The matrix multiplication  $\mathbf{XY}$  can be estimated as

$$\text{GEMM}(\mathbf{X}, \mathbf{Y}) = \sum_{i=1}^m \mathbf{X}_{:,i} \mathbf{Y}_{i,:} \approx \sum_{t=1}^k \frac{1}{kp_{i_t}} \mathbf{X}_{:,i_t} \mathbf{Y}_{i_t,:} = \mathbf{X}' \mathbf{Y}',$$

517 Equation (3) shows the approximation error  $\mathbb{E}[\|\mathbf{XY} - \mathbf{X}' \mathbf{Y}'\|_F]$  is minimized when the probabilities

$$p_i = \frac{\|\mathbf{X}_{:,i}\|_2 \|\mathbf{Y}_{i,:}\|_2}{\sum_{j=1}^m \|\mathbf{X}_{:,j}\|_2 \|\mathbf{Y}_{j,:}\|_2}.$$

518 *Proof.* Let  $f(i) = \frac{\mathbf{X}_{:,i} \mathbf{Y}_{i,:}}{p_i} \in \mathbb{R}^{n \times q}$ . We note that  $f(i)$  is an unbiased estimation of  $\mathbf{XY}$ . Namely,

$$\mathbb{E}_{j \sim \mathcal{P}}[f(j)] = \sum_{i=1}^m p_i \frac{\mathbf{X}_{:,i} \mathbf{Y}_{i,:}}{p_i} = \mathbf{XY}.$$

519 Then we have

$$\mathbf{X}' \mathbf{Y}' = \frac{1}{k} \sum_{t=1}^k f(i_t), \quad (8)$$

520 where  $i_1, \dots, i_t$  are the index of the sampled column-row pairs at  $t^{\text{th}}$  random trials. For each  $i_t$ , its  
521 variance is

$$\begin{aligned} \text{Var}[f(i_t)] &= \text{Var}\left[\frac{\mathbf{X}_{:,i_t} \mathbf{Y}_{i_t,:}}{p_{i_t}}\right] \\ &= \mathbb{E}\left[\frac{\mathbf{X}_{:,i_t}^2 \mathbf{Y}_{i_t,:}^2}{p_{i_t}^2}\right] - \mathbb{E}^2\left[\frac{\mathbf{X}_{:,i_t} \mathbf{Y}_{i_t,:}}{p_{i_t}}\right] \\ &= \mathbb{E}\left[\frac{\mathbf{X}_{:,i_t}^2 \mathbf{Y}_{i_t,:}^2}{p_{i_t}^2}\right] - (\mathbf{XY})^2. \\ &= \sum_{t=1}^m \frac{\mathbf{X}_{:,t}^2 \mathbf{Y}_{t,:}^2}{p_t} - (\mathbf{XY})^2. \end{aligned} \quad (9)$$

522 where the first step follows from the fact that  $\text{Var}[\mathbf{x}] = \mathbb{E}[\mathbf{x}^2] - \mathbb{E}^2[\mathbf{x}]$ .

523 Then we have,

$$\begin{aligned} \mathbb{E}[\|\mathbf{XY} - \mathbf{X}' \mathbf{Y}'\|_F] &= \sum_{i=1}^n \sum_{j=1}^q \mathbb{E}[(\mathbf{XY} - \mathbf{X}' \mathbf{Y}')_{ij}^2] \\ &= \sum_{i=1}^n \sum_{j=1}^q \text{Var}[(\mathbf{X}' \mathbf{Y}')_{ij}]. \end{aligned}$$

524 By combining Equation (8) and Equation (9) into the above equation, we have

$$\begin{aligned} \mathbb{E}[\|\mathbf{XY} - \mathbf{X}' \mathbf{Y}'\|_F] &= \frac{1}{k} \sum_{i=1}^n \sum_{j=1}^q \sum_{t=1}^m \frac{\mathbf{X}_{it}^2 \mathbf{Y}_{tj}^2}{p_t} - \frac{1}{k} \|\mathbf{XY}\|_F^2. \\ &= \frac{1}{k} \sum_{t=1}^m \frac{\|\mathbf{X}_{:,t}\|_2^2 \|\mathbf{Y}_{t,:}\|_2^2}{p_t} - \frac{1}{k} \|\mathbf{XY}\|_F^2. \end{aligned}$$

525 To minimize  $\mathbb{E}[\|\mathbf{XY} - \mathbf{X}'\mathbf{Y}'\|_F]$ , the optimal probability distribution can be obtained via solving  
 526 the following optimization problem:

$$\begin{aligned} \min_{p_1, \dots, p_m} \quad & \sum_{t=1}^m \frac{\|\mathbf{X}_{:,t}\|_2^2 \|\mathbf{Y}_{t,:}\|_2^2}{p_t}, \\ \text{s.t.} \quad & \sum_{t=1}^m p_t = 1. \end{aligned}$$

527 The solution to the above convex problem is the distribution defined in Equation (3). Namely,

$$p_i = \frac{\|\mathbf{X}_{:,i}\|_2 \|\mathbf{Y}_{i,:}\|_2}{\sum_{j=1}^m \|\mathbf{X}_{:,j}\|_2 \|\mathbf{Y}_{j,:}\|_2}.$$

528 □

## 529 C.2 Unbiasedness of Our Proposed Estimator

530 **Theorem 1** (Proof in Appendix C.2). *The estimator defined in Equation (4) is an unbiased estimator*  
 531 *for matrix production  $\mathbf{XY}$ , i.e.,  $\mathbb{E}_{j \sim \mathcal{P}^{\mathcal{D} \setminus \mathcal{C}}} [\sum_{c \in \mathcal{C}} f(c)p_c + (1 - \sum_{c \in \mathcal{C}} p_c)f(j)] = \mathbf{XY}$ .*

*Proof.*

$$\begin{aligned} & \mathbb{E}_{j \sim \mathcal{P}^{\mathcal{D} \setminus \mathcal{C}}} \left[ \sum_{c \in \mathcal{C}} f(c)p_c + (1 - \sum_{c \in \mathcal{C}} p_c)f(j) \right] \\ &= \sum_{c \in \mathcal{C}} f(c)p_c + (1 - \sum_{c \in \mathcal{C}} p_c) \mathbb{E}_{j \sim \mathcal{P}^{\mathcal{D} \setminus \mathcal{C}}} [f(j)] \\ &= \sum_{c \in \mathcal{C}} f(c)p_c + (1 - \sum_{c \in \mathcal{C}} p_c) \sum_{j \in \mathcal{D} \setminus \mathcal{C}} \frac{p_j}{1 - \sum_{c \in \mathcal{C}} p_c} f(j) \\ &= \sum_{c \in \mathcal{C}} f(c)p_c + \sum_{j \in \mathcal{D} \setminus \mathcal{C}} f(j)p_j \\ &= \mathbb{E}_{j \sim \mathcal{P}} [f(j)] \\ &= \mathbf{XY} \end{aligned}$$

532 □

## 533 C.3 Variance of Our Proposed Estimator

534 **Theorem 2** (Proof in Appendix C.3). *Suppose the total budget of column-row pairs is  $k$ . If  $\mathcal{C}$  satisfies*

$$\sum_{c \in \mathcal{C}} p_c > \frac{|\mathcal{C}|}{k}, \quad (7)$$

535 *then we have  $\text{Var}[\hat{g}(\mathbf{X}, \mathbf{Y})] < \text{Var}[g(\mathbf{X}, \mathbf{Y})]$ . Moreover,  $\text{Var}[\hat{g}(\mathbf{X}, \mathbf{Y})]$  is minimized when  $|\mathcal{C}| =$*   
 536  $\min_{|\mathcal{C}| \in \{0, \dots, k\}} \frac{1 - \sum_{c \in \mathcal{C}} p_c}{k - |\mathcal{C}|}.$

537 *Proof.* Recall that the original estimator for matrix production  $\mathbf{XY}$  is defined as

$$\mathbb{E}_{i \sim \mathcal{P}} [f(i)]. \quad (10)$$

538 and our proposed family of estimator is defined as:

$$h(j) = \mathbb{E}_{j \sim \mathcal{P}^{\mathcal{D} \setminus \mathcal{C}}} \left[ \sum_{c \in \mathcal{C}} f(c)p_c + (1 - \sum_{c \in \mathcal{C}} p_c)f(j) \right]. \quad (11)$$

539 We first define three independent random variables as follows:

$$u \sim \mathcal{P}^{\mathcal{C}}, \quad (12)$$

$$j \sim \mathcal{P}^{\mathcal{D} \setminus \mathcal{C}}, \quad (13)$$

$$b \sim \text{Bernoulli}(1 - \sum_{c \in \mathcal{C}} p_c). \quad (14)$$

540 According to the Law of total variance, we have

$$\begin{aligned} \text{Var}[f(i)] &= \mathbb{E}_b \left[ \text{Var}[f(i)|b] \right] + \text{Var}_b \left[ \mathbb{E}[f(i)|b] \right] \\ &\geq \mathbb{E}_b \left[ \text{Var}[f(i)|b] \right] \\ &= \sum_{c \in \mathcal{C}} p_c \text{Var}[f(i)|b=0] + (1 - \sum_{c \in \mathcal{C}} p_c) \text{Var}[f(i)|b=1] \\ &\geq (1 - \sum_{c \in \mathcal{C}} p_c) \text{Var}[f(i)|i \in \mathcal{D} \setminus \mathcal{C}] \end{aligned} \quad (15)$$

541 where the first step follows from the fact that for any random variance  $\mathbf{x}, \mathbf{y}$ , we have  $\text{Var}[\mathbf{y}] =$   
542  $\mathbb{E}[\text{Var}[\mathbf{y}|\mathbf{x}]] + \text{Var}[\mathbb{E}[\mathbf{y}|\mathbf{x}]]$ . Also, by Equation (11), we have

$$\text{Var}[h(j)] = (1 - \sum_{c \in \mathcal{C}} p_c)^2 \text{Var}[f(j)|j \in \mathcal{D} \setminus \mathcal{C}]. \quad (16)$$

543 By combining the above two inequality, we have

$$\text{Var}[h(j)] \leq (1 - \sum_{c \in \mathcal{C}} p_c) \text{Var}[f(i)]. \quad (17)$$

544 Equation (17) quantitatively shows the variance reduction of  $h(j)$  over  $f(i)$ . Then we compare our  
545 estimator  $\hat{g}(\mathbf{X}, \mathbf{Y})$  and  $g(\mathbf{X}, \mathbf{Y})$  in terms of variance.

546 First, because  $g(\mathbf{X}, \mathbf{Y}) = \frac{1}{k} \sum_{t=1}^k f(i_t)$ ,  $i_1, \dots, i_k \stackrel{\text{i.i.d}}{\sim} \mathcal{P}$ . Thus we have

$$\text{Var}[g(\mathbf{X}, \mathbf{Y})] = \frac{1}{k} \text{Var}[f(i)]. \quad (18)$$

547 Similarly, we have

$$\text{Var}[\hat{g}(\mathbf{X}, \mathbf{Y})] = \frac{1}{k - |\mathcal{C}|} \text{Var}[h(j)]. \quad (19)$$

548 By combining Equation (17) into the above two equations, we have

$$\begin{aligned} \text{Var}[\hat{g}(\mathbf{X}, \mathbf{Y})] &= \frac{1}{k - |\mathcal{C}|} \text{Var}[h(j)] \\ &\leq \frac{1 - \sum_{c \in \mathcal{C}} p_c}{k - |\mathcal{C}|} \text{Var}[f(i)] \\ &\leq \frac{1 - \sum_{c \in \mathcal{C}} p_c}{k - |\mathcal{C}|} k \text{Var}[g(\mathbf{X}, \mathbf{Y})], \end{aligned} \quad (20)$$

549 where the first step follows from Equation (17). By setting  $\frac{1 - \sum_{c \in \mathcal{C}} p_c}{k - |\mathcal{C}|} k \leq 1$ , we arrive the conclusion  
550 that when  $\sum_{c \in \mathcal{C}} p_c > \frac{|\mathcal{C}|}{k}$ , we have  $\text{Var}[\hat{g}(\mathbf{X}, \mathbf{Y})] \leq \text{Var}[g(\mathbf{X}, \mathbf{Y})]$ .

551 Further,  $\frac{1 - \sum_{c \in \mathcal{C}} p_c}{k - |\mathcal{C}|} k$  achieves the minimal when  $|\mathcal{C}| = \min_{|\mathcal{C}| \in \{0, \dots, k\}} \frac{1 - \sum_{c \in \mathcal{C}} p_c}{k - |\mathcal{C}|}$ .

552 □

## 553 D Implementation Details

554 The pseudocode for approximated linear layer with WTA-CRS and standard line layer is given in  
 555 Algorithm 1 and Algorithm 3, respectively. The column-row pair sampling procedure is given in  
 556 Algorithm 2. For the ease of illustration, we ignore the sequential length. As we mentioned in the  
 557 main text, we only replace the GEMM in the backward pass with WTA-CRS. According to Equation (1c),  
 558 we need the activation gradient  $\nabla \mathbf{Z}$  to perform the column-row pair sampling during the forward pass.  
 559 Thus we initialize a cache in CPU memory to store the gradient norm of activations from the last  
 560 step. When performing column-row pair selection, we need to swap the gradient norm of activations  
 561 between CPU and GPU, which will cause extra time overhead due to the data movement. Fortunately,  
 562 we note that the number of elements in the gradient norm of activations is significantly less than the  
 563 one in activations, which does not cause a significant time overhead.

---

### Algorithm 1: Forward & Backward pass of Approximated Linear Layer

---

**Hyperparameter:** The total budget of column-row pairs  $k$ .

**procedure** INIT:

Initialize  $\text{Cache} \in \mathbb{R}^N$  as an empty matrix in main memory //  $N$  is the total number  
 of samples in the dataset. Cache is used for saving the norm of  
 output gradient  $\nabla \mathbf{Z}$ .

**end**

**procedure** FORWARD PASS:

**Input:** activation  $\mathbf{H} \in \mathbb{R}^{B \times D}$ , weight  $\mathbf{W} \in \mathbb{R}^{D \times D}$ , indices of the current batch samples

$BI = \{j_1, \dots, j_B\}$ .

$\text{ctx} \leftarrow \{\}$  // the context which saves tensors for backward

$\mathbf{Z} = \mathbf{H}\mathbf{W}$

$\mathbf{H}', \text{ind} \leftarrow \text{SUBSAMPLE}(\mathbf{H}, \text{Cache}[BI], k)$

//  $\text{Cache}[BI]$  is the cached gradient norm from the backward pass;  $\text{ind}$   
 is the set of involved column-row pair indices

$\text{ctx} \leftarrow \{\mathbf{H}', \mathbf{W}, BI, \text{ind}\}$

**return**  $\mathbf{Z}$

**end**

**procedure** BACKWARD PASS:

**Input:**  $\text{ctx}$  from the forward pass, output gradient  $\nabla \mathbf{Z} \in \mathbb{R}^{B \times D}$

$\mathbf{H}', \mathbf{W}, BI, \text{ind} \leftarrow \text{ctx}$

$\nabla \mathbf{H} = \nabla \mathbf{Z} \mathbf{W}^\top$

$\nabla \mathbf{Z}' \leftarrow \nabla \mathbf{Z}[\text{ind}]$

//  $\nabla \mathbf{Z}' \in \mathbb{R}^{k \times D}$

$\nabla \mathbf{W} = \mathbf{H}'^\top \nabla \mathbf{Z}'$

**for**  $j$  in  $BI$  **do**

|  $\text{Cache}[j] = \|\nabla \mathbf{Z}_{j,:}\|_2$

**end**

// Update the gradient norm of samples in the current batch

**return**  $\nabla \mathbf{H}, \nabla \mathbf{W}$

**end**

---

---

**Algorithm 2:** SUBSAMPLE

---

**Input:** activation  $\mathbf{H} \in \mathbb{R}^{B \times D}$ , gradient norm  $\mathbf{z} \in \mathbb{R}^B$ , the total budget of column-row pairs  $k$ .

**for**  $i = 1, \dots, B$  **do**

$p_i \leftarrow \frac{\mathbf{z}_i \|\mathbf{H}_{i,:}\|_2}{\sum_{j=1}^B \mathbf{z}_j \|\mathbf{H}_{j,:}\|_2}$  // The probability of column-row pairs defined in Equation (3).

**end**

$\hat{k} \leftarrow \min_{\hat{k} \in \{0, \dots, k\}} \frac{1 - \sum_{c \in \mathcal{C}} p_c}{k - \hat{k}}$ , s.t.  $\mathcal{C} = |\hat{k}|$ . //  $\mathcal{C}$  is the set of column-row pair indices associated with  $|\mathcal{C}|$  largest  $p_i$ .

Sample  $k - |\mathcal{C}|$  i.i.d. column-row pairs  $\mathcal{C}_{\text{stoc}} = \{i_1, \dots, i_{k-|\mathcal{C}|}\}$  from the distribution  $\mathcal{P}^{\mathcal{D} \setminus \mathcal{C}}$

$\text{ind} \leftarrow \mathcal{C} \cup \mathcal{C}_{\text{stoc}}$

**for**  $j \in \mathcal{C}_{\text{stoc}}$  **do**

$\mathbf{H}[j, :] \leftarrow \mathbf{H}[j, :] * \frac{1 - \sum_{c \in \mathcal{C}} p_c}{(k - |\mathcal{C}|) p_j}$  // We need to normalize the stochastic part in Equation (6) to ensure the unbiasedness.

**end**

$\mathbf{H}' \leftarrow \mathbf{H}[\text{ind}]$  //  $\mathbf{H}' \in \mathbb{R}^{k \times D}$

**return**  $\mathbf{H}', \text{ind}$

---

---

**Algorithm 3:** Forward & Backward pass of the standard Linear layer

---

**procedure** FORWARD PASS:

**Input:** activation  $\mathbf{H}_Q \in \mathbb{R}^{B \times D}$ , weight  $\mathbf{W}_Q \in \mathbb{R}^{D \times D}$ , batch indices  $\text{index}$

$\text{ctx} \leftarrow \{\}$  // the context which saves tensors for backward

$\mathbf{Z}_Q = \mathbf{H}_Q \mathbf{W}_Q$

$\text{ctx} \leftarrow \{\mathbf{H}_Q, \mathbf{W}_Q\}$

**return**  $\mathbf{Z}_Q$

**end**

**procedure** BACKWARD PASS:

**Input:**  $\text{ctx}$  from the forward pass, output gradient  $\nabla \mathbf{Z}_Q$

$\mathbf{H}_Q, \mathbf{W}_Q \leftarrow \text{ctx}$

$\nabla \mathbf{H}_Q = \nabla \mathbf{Z}_Q \mathbf{W}_Q^\top$

$\nabla \mathbf{W}_Q = \mathbf{H}_Q^\top \nabla \mathbf{Z}_Q$

**return**  $\nabla \mathbf{H}_Q, \nabla \mathbf{W}_Q$

**end**

---

## 564 E More Experimental Results

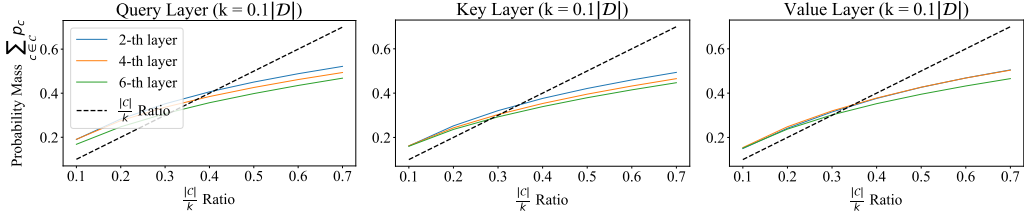

Fig. 10. The probability mass  $\sum_{c \in \mathcal{C}} p_c$  versus  $\frac{|\mathcal{C}|}{k}$  in Equation (7) at  $k = 0.1|\mathcal{D}|$ . Here we visualize the column-row index distribution of query/key/value layer T5-base model, fine-tuned on RTE dataset.

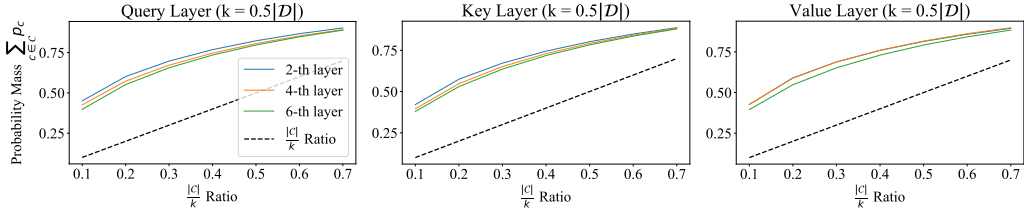

Fig. 11. The probability mass  $\sum_{c \in \mathcal{C}} p_c$  versus  $\frac{|\mathcal{C}|}{k}$  in Equation (7) at  $k = 0.5|\mathcal{D}|$ . Here we visualize the column-row index distribution of query/key/value layer T5-base model, fine-tuned on RTE dataset.

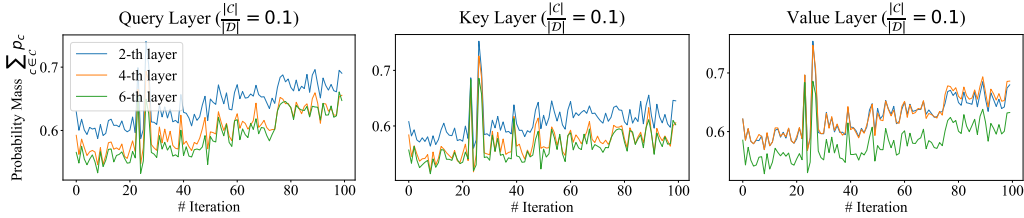

Fig. 12. The probability mass of top-10% column-row pairs in Equation (3) versus iterations. Here we visualize the query/key/value layer T5-base model, fine-tuned on RTE dataset.

### 565 E.1 More Experimental Analysis on Theorem 2

566 To evaluate Theorem 2 more comprehensively, below we also plot the  $\sum_{c \in \mathcal{C}} p_c$  versus  $\frac{|\mathcal{C}|}{k}$  at  $k =$   
 567  $0.1|\mathcal{D}|$  and  $k = 0.5|\mathcal{D}|$  in Figure 10 and 11, respectively. We also plot  $\sum_{c \in \mathcal{C}} p_c$  versus iterations  
 568 in Figure 12. We summarize that the the column-row index distribution is concentrated on a few  
 569 column-row pairs. Thus, the assumption in Theorem 2 holds under the context of fine-tuning  
 570 transformers.

### 571 E.2 More Experimental Speed Analysis

572 Increasing the batch size can often result in faster model convergence and/or enhance the final  
 573 performance. Ideally, we should adjust the batch size according to the requirements of our model  
 574 rather than being constrained by the GPU’s memory capacity. To illustrate this, we have represented  
 575 the correlation between peak memory usage and maximum mini-batch size for T5-Base, T5-Large,  
 576 and T5-3B in Figure 13. Our observations highlight that WTA-CRS effectively increases the maximum  
 577 available batch size.

578 We also provide the apple-to-apple speed comparison for linear operation with and without WTA-CRS  
 579 in Table 3. In Table 3, “Fwd”, “Bwd”, and “F-B” are the time of forward pass, the time of backward  
 580 pass, and the total time for both the forward and backward pass, respectively. We summarize that  
 581 under the same workload, the current implementation of WTA-CRS may roughly slow down the linear

|     | Method  | T5-<br>ATT | T5-<br>FF | T5<br>Block | T5-<br>Large |
|-----|---------|------------|-----------|-------------|--------------|
| Fwd | Full    | 8          | 10        | 17          | 1052         |
|     | WTA-CRS | 22         | 16        | 37          | 2013         |
| Bwd | Full    | 16         | 19        | 34          | 2073         |
|     | WTA-CRS | 15         | 14        | 30          | 1738         |
| F-B | Full    | 24         | 29        | 51          | 3125         |
|     | WTA-CRS | 37         | 30        | 67          | 3751         |

Table 3: Latency (ms) of Forward and Backward pass.

operation about 20%. This is because the extra sampling process and data movement counteract the acceleration (see Algorithm 1). However, we note that (1) the overhead can be greatly reduced with better implementation, e.g., using prefetch and operation-fusion technique [28]; (2) the existing implementation can still yield a large speedup when employing larger batch sizes (Figure 9).

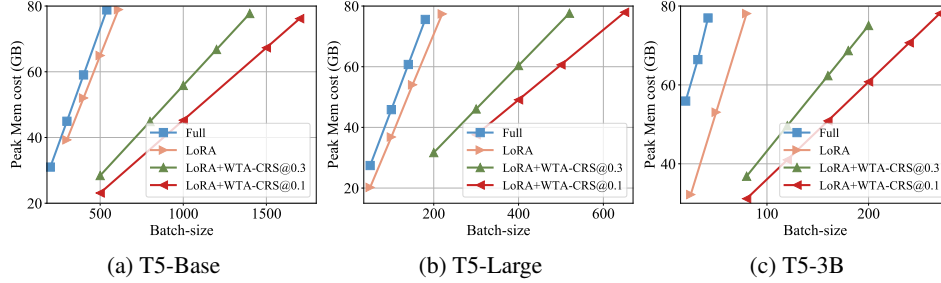

Fig. 13. Peak memory usage versus maximum mini-batch size of T5.

## F Experimental Settings

We give the detailed hyper-parameter setting in this section. Specifically, for both T5 and BERT models, the parameters are updated with the AdamW optimizer  $\beta_1 = 0.9$   $\beta_2 = 0.999$   $\epsilon = 10^{-8}$  and weight decay = 0. The the learning rate is adjusted with a linear LR Scheduler, which maintains a constant learning rate for the initial 500 steps, and adjusts it gradually thereafter. The input sequences are padded to the maximum length 128. WTA-CRS has a LoRA dimension 32 if it is combined with LoRA. To achieve the optimal solution, the T5-Base, Large, 3B and BERT-Base and Large models have different learning rate, training epoch number, and mini-batch size on different datasets, which are given in Tables 5, 6, 7, respectively.

### F.1 Computational Infrastructure

The computational infrastructure information is given in Table 4.

Table 4: Computing infrastructure for the experiments.

| Device Attribute         | Value       |
|--------------------------|-------------|
| Computing infrastructure | GPU         |
| GPU model                | NVIDIA-A100 |
| GPU Memory               | 81251MB     |
| CUDA Version             | 11.4        |
| CPU Memory               | 512GB       |

Table 5: Learning rate.

| Model      | Method           | CoLA | SST-2 | MRPC | QQP  | MNLI | QNLI | RTE  | STS-B |
|------------|------------------|------|-------|------|------|------|------|------|-------|
| BERT-Base  | WTA-CRS@0.3      |      |       |      | 2e-5 |      |      |      |       |
|            | LoRA+WTA-CRS@0.3 | 2e-4 | 5e-4  | 2e-4 | 3e-4 | 3e-4 | 2e-4 | 2e-4 | 3e-4  |
| T5-Base    | WTA-CRS@0.3      |      |       | 3e-5 |      |      | 3e-6 | 3e-5 | 3e-5  |
|            | WTA-CRS@0.1      |      |       |      | 3e-5 |      |      |      |       |
|            | LoRA+WTA-CRS@0.3 | 3e-4 | 3e-5  | 3e-4 | 3e-5 | 3e-5 | 3e-5 | 3e-4 | 3e-4  |
|            | LoRA+WTA-CRS@0.1 | 3e-4 | 3e-5  | 3e-4 | 3e-5 | 3e-5 | 3e-5 | 3e-4 | 3e-4  |
| BERT-Large | WTA-CRS@0.3      |      |       |      | 2e-5 |      |      |      |       |
|            | LoRA+WTA-CRS@0.3 | 3e-4 | 2e-4  | 2e-4 | 2e-4 | 2e-4 | 2e-4 | 3e-4 | 3e-4  |
| T5-Large   | WTA-CRS@0.3      |      |       | 3e-5 |      |      | 3e-6 | 3e-5 | 3e-5  |
|            | WTA-CRS@0.1      |      |       | 3e-5 |      |      | 3e-6 | 3e-5 | 3e-5  |
|            | LoRA+WTA-CRS@0.3 | 3e-4 | 3e-5  | 3e-4 | 3e-5 | 3e-5 | 3e-5 | 3e-4 | 3e-4  |
|            | LoRA+WTA-CRS@0.1 | 3e-4 | 3e-5  | 3e-4 | 3e-5 | 3e-5 | 3e-5 | 3e-4 | 3e-4  |
| T5-3B      | LoRA+WTA-CRS@0.3 | 3e-4 | 3e-5  | 3e-4 | 3e-4 | 3e-4 | 3e-5 | 3e-4 | 3e-4  |
|            | LoRA+WTA-CRS@0.1 | 3e-4 | 3e-5  | 3e-4 | 3e-4 | 3e-4 | 3e-5 | 3e-4 | 3e-4  |

Table 6: Training epoch number.

| Model      | Method           | CoLA | SST-2 | MRPC | QQP | MNLI | QNLI | RTE | STS-B |
|------------|------------------|------|-------|------|-----|------|------|-----|-------|
| BERT-Base  | WTA-CRS@0.3      | 20   | 20    | 10   | 10  | 10   | 10   | 20  | 10    |
|            | LoRA+WTA-CRS@0.3 | 60   | 20    | 20   | 20  | 20   | 20   | 40  | 40    |
| T5-Base    | WTA-CRS@0.3      | 40   | 10    | 20   | 10  | 10   | 10   | 50  | 20    |
|            | WTA-CRS@0.1      | 40   | 10    | 20   | 10  | 10   | 10   | 50  | 20    |
|            | LoRA+WTA-CRS@0.3 | 40   | 10    | 20   | 20  | 20   | 10   | 50  | 20    |
|            | LoRA+WTA-CRS@0.1 | 40   | 10    | 20   | 20  | 20   | 10   | 50  | 20    |
| BERT-Large | WTA-CRS@0.3      | 60   | 20    | 20   | 10  | 10   | 10   | 40  | 10    |
|            | LoRA+WTA-CRS@0.3 | 60   | 20    | 20   | 20  | 20   | 20   | 40  | 40    |
| T5-Large   | WTA-CRS@0.3      | 20   | 10    | 20   | 10  | 10   | 10   | 40  | 20    |
|            | WTA-CRS@0.1      | 20   | 10    | 20   | 10  | 10   | 10   | 40  | 20    |
|            | LoRA+WTA-CRS@0.3 | 40   | 10    | 40   | 10  | 10   | 10   | 60  | 20    |
|            | LoRA+WTA-CRS@0.1 | 40   | 10    | 20   | 10  | 10   | 10   | 60  | 20    |
| T5-3B      | LoRA+WTA-CRS@0.3 | 40   | 10    | 20   | 10  | 10   | 10   | 60  | 20    |
|            | LoRA+WTA-CRS@0.1 | 40   | 10    | 20   | 10  | 10   | 10   | 60  | 20    |

Table 7: Training mini-batch size.

| Model            | Method           | CoLA | SST-2 | MRPC | QQP | MNLI | QNLI | RTE | STS-B |
|------------------|------------------|------|-------|------|-----|------|------|-----|-------|
| BERT-Base/Large  | WTA-CRS@0.3      |      |       |      | 128 |      |      |     | 16    |
|                  | LoRA+WTA-CRS@0.3 |      |       |      | 128 |      |      |     | 16    |
| T5-Base/Large/3B | WTA-CRS@0.3      |      |       |      |     | 100  |      |     |       |
|                  | WTA-CRS@0.1      |      |       |      |     | 100  |      |     |       |
|                  | LoRA+WTA-CRS@0.3 |      |       |      |     | 100  |      |     |       |
|                  | LoRA+WTA-CRS@0.1 |      |       |      |     | 100  |      |     |       |
